# Supplementary material
Source: PubMed Central journal article supplement (PMC4380825)
Supplement: NIHMS654639-supplement-supplement_1.pdf [file NIHMS654639-supplement-supplement_1.pdf]

1 Supplemental Table 1: **Maternal Reported BMI: Hazard ratios and corresponding 95%**  
 2 confidence intervals of maternal BMI category and time to achieve gross motor milestones using  
 3 normal BMI as the reference category.

4

|                                 |            | Model 1                  |                     | Model 2                  |                     | Model 3                  |                     |
|---------------------------------|------------|--------------------------|---------------------|--------------------------|---------------------|--------------------------|---------------------|
|                                 |            | Hazard Ratio<br>(95% CI) | P-Value             | Hazard Ratio<br>(95% CI) | P-Value             | Hazard Ratio<br>(95% CI) | P-Value             |
| <b>Sit without Support</b>      | Obese      | 0.92 (0.85, 0.99)        | 0.04 <sup>+</sup>   | 0.90 (0.83, 0.97)        | 0.01 <sup>+</sup>   | 0.92 (0.84, 0.99)        | 0.04 <sup>+</sup>   |
|                                 | Overweight | 1.00 (0.92, 1.07)        | 0.90                | 0.99 (0.91, 1.07)        | 0.76                | 0.98 (0.90, 1.06)        | 0.63                |
| <b>Crawl on Hands and Knees</b> | Obese      | 0.87 (0.80, 0.94)        | <0.001 <sup>+</sup> | 0.85 (0.78, 0.93)        | <0.001 <sup>+</sup> | 0.85 (0.78, 0.93)        | <0.001 <sup>+</sup> |
|                                 | Overweight | 0.96 (0.88, 1.04)        | 0.35                | 0.95 (0.87, 1.03)        | 0.23                | 0.94 (0.86, 1.02)        | 0.15                |
| <b>Stand with Assistance</b>    | Obese      | 0.93 (0.85, 1.00)        | 0.07                | 0.91 (0.83, 0.99)        | 0.03 <sup>+</sup>   | 0.90 (0.82, 0.98)        | 0.02 <sup>+</sup>   |
|                                 | Overweight | 0.97 (0.90, 1.05)        | 0.53                | 0.96 (0.88, 1.04)        | 0.34                | 0.94 (0.86, 1.02)        | 0.15                |
| <b>Walk With Assistance</b>     | Obese      | 0.98 (0.90, 1.06)        | 0.63                | 0.96 (0.88, 1.05)        | 0.43                | 0.97 (0.88, 1.05)        | 0.44                |
|                                 | Overweight | 1.01 (0.93, 1.06)        | 0.80                | 1.00 (0.91, 1.08)        | 0.96                | 0.99 (0.90, 1.07)        | 0.78                |
| <b>Stand Alone</b>              | Obese      | 1.01 (0.92, 1.10)        | 0.87                | 1.00 (0.90, 1.09)        | 0.94                | 0.99 (0.90, 1.08)        | 0.82                |
|                                 | Overweight | 1.03 (0.94, 1.12)        | 0.55                | 1.01 (0.92, 1.10)        | 0.87                | 1.00 (0.91, 1.09)        | 1.00                |
| <b>Walk Alone</b>               | Obese      | 0.93 (0.84, 1.01)        | 0.11                | 0.94 (0.85, 1.03)        | 0.20                | 0.95 (0.86, 1.03)        | 0.24                |
|                                 | Overweight | 0.95 (0.86, 1.03)        | 0.23                | 0.95 (0.87, 1.04)        | 0.30                | 0.95 (0.86, 1.03)        | 0.23                |

5

6 <sup>+</sup>Statistically significant at the p=0.05 level

7

8 **Model 1:** Adjusted by maternal age only.

8

9 **Model 2:** Adjusted by maternal age, maternal race, maternal education, marital status, smoking status before and during pregnancy, alcohol use during pregnancy, and private insurance.

9

10 **Model 3:** Adjusted for covariates in the Model 2 + plurality, infant gender, birth weight, and gestational age.

10

11
